# Supplementary material for: Antineoplastic Activity of Rhus trilobata Nutt. (Anacardiaceae) against Ovarian Cancer and Identification of Active Metabolites in This Pathology
Source: MDPI journal article supplement (doi:10.3390/plants10102074), 2021-09-30
Supplement: s1 [file s1]

Supplementary Materials

1. Supplementary Figures

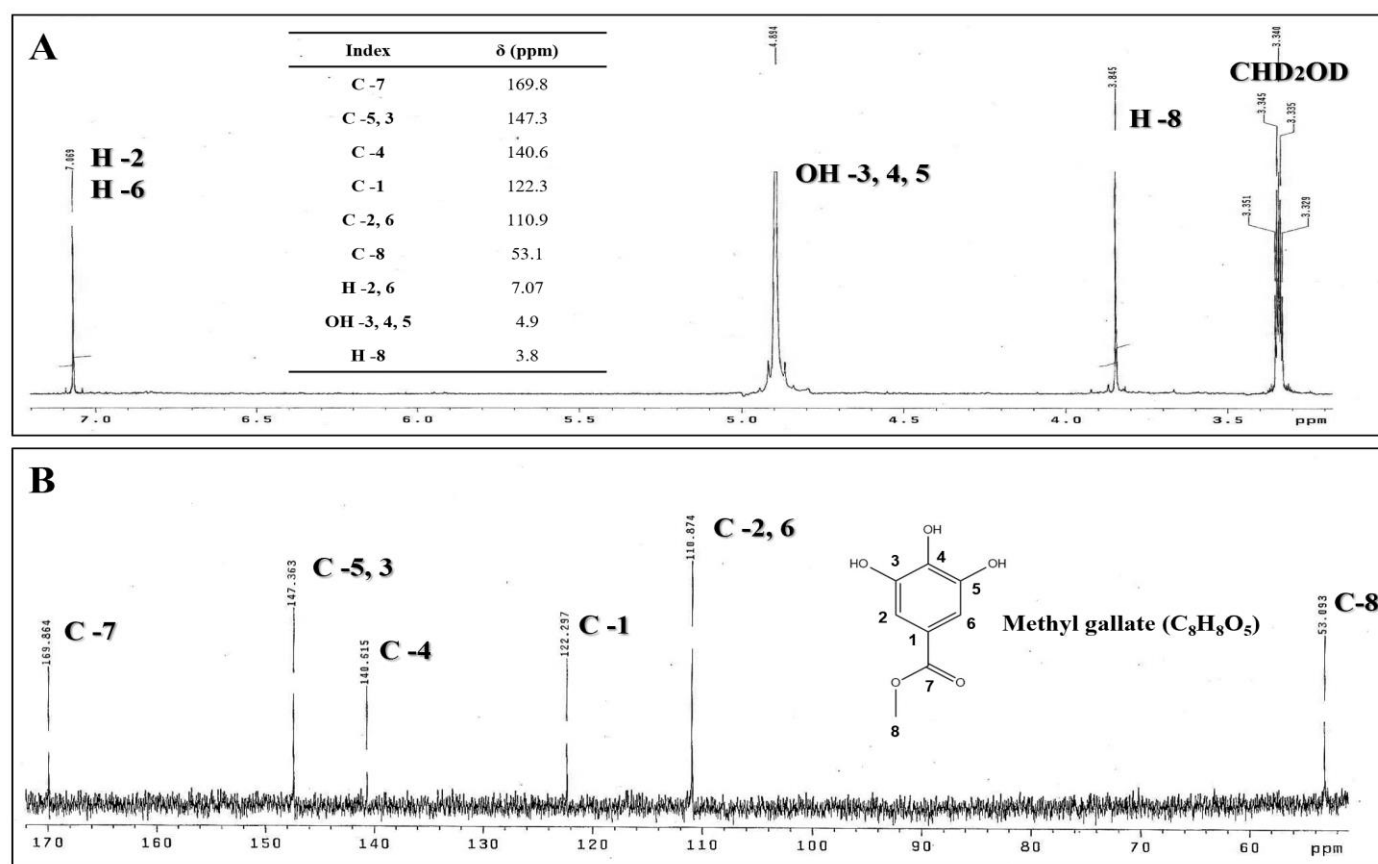

**Figure S1.** Spectrum of methyl 3,4,5-trihydroxybenzoate ( $C_8H_8O_5$ ) by NMR at 300 MHz. The figure shows the chemical structure and  $\delta$  (ppm) of the compound.  $^1H$ -NMR (A) and  $^{13}C$ -NMR (B). Results of three biological replicates ( $n = 3$ , in triplicates). The compound was putatively identified by the fragmentation pattern and metabolic databases (AraCyc, PlantCyc, and KEGG).

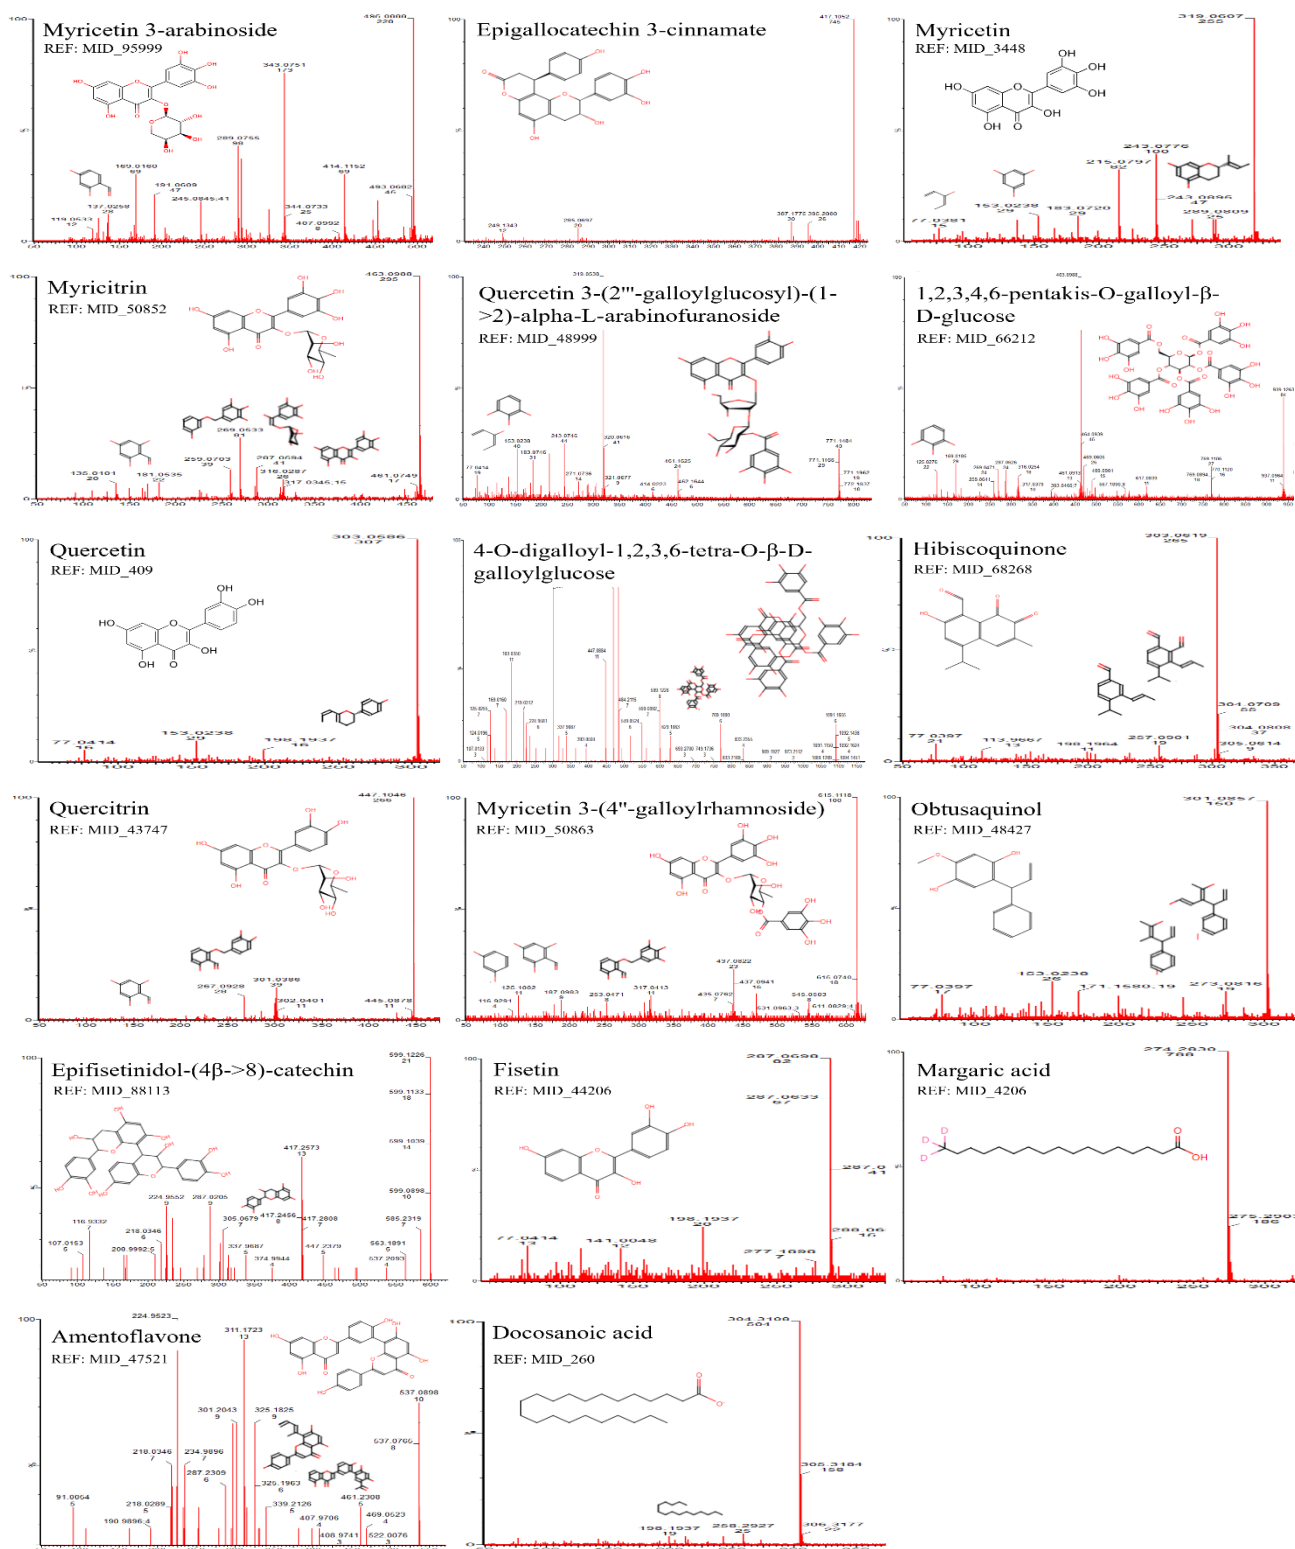

**Figure S2. MS/MS analysis of compounds most abundant in AF02-RHTR.** Figure show fragmentation pattern utilized for putatively identified the compounds most abundant in AF02, by comparison with reports in plant metabolomics databases with Progenesis® QI. The inset show fragmentation of standard compounds used for corroborating the identification.

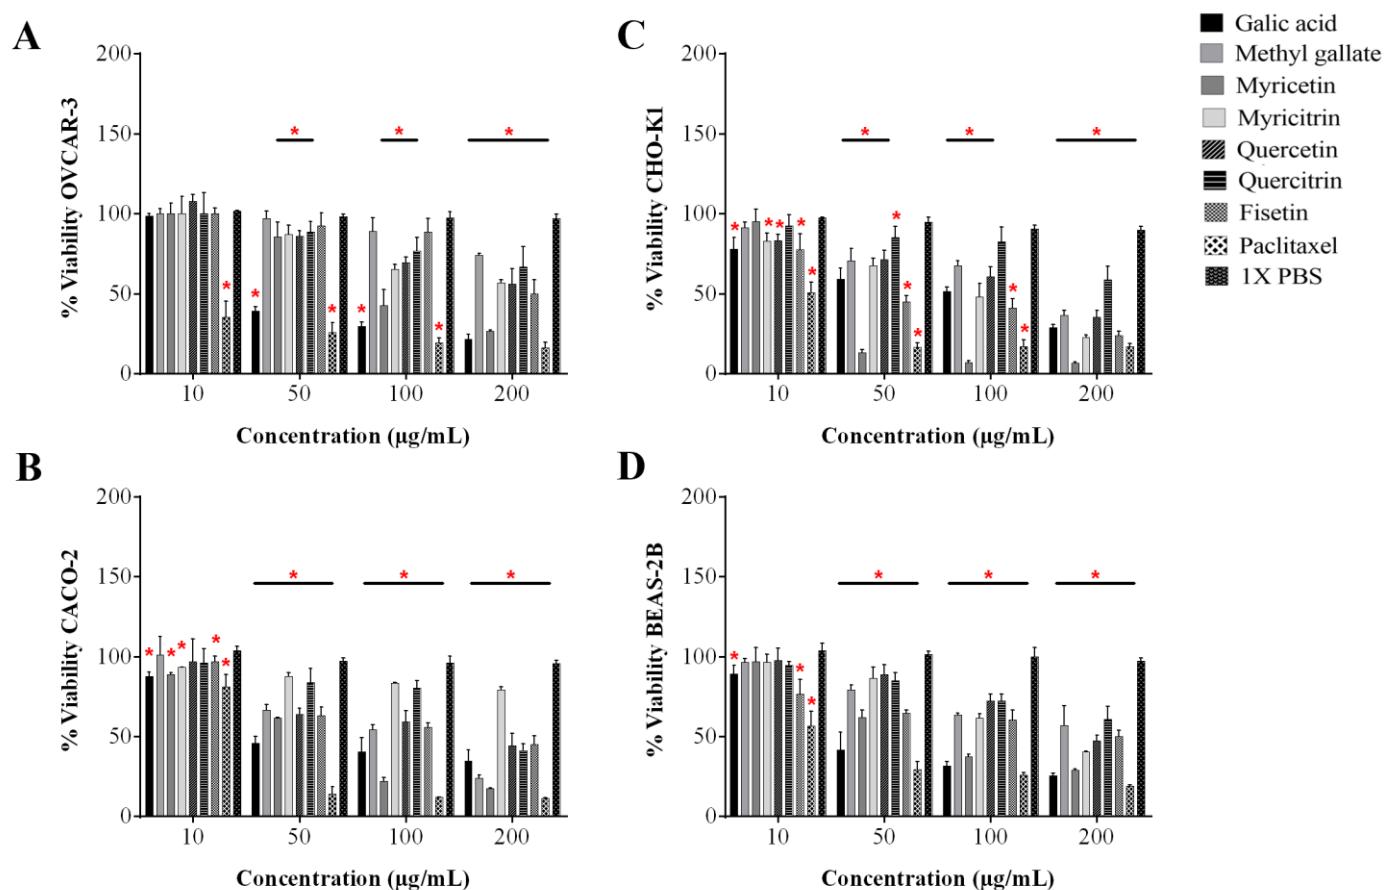

**Figure S3. Biological activity of metabolites in RHTR into ovarian cancer and normal cell lines.** The  $\text{IC}_{50}$  was determined by dose-response viability curves with MTT for 24 h in OVCAR-3 (A), CACO-2 (B), CHO-K1 (C) and BEAS-2B (D) cells. Results show the mean  $\pm$  S.D. of three biological replicates ( $n = 3$ , in triplicates); \*,  $p \leq 0.05$  vs. the vehicle group without treatment (0.5 % DMSO) (ANOVA). The positive control was paclitaxel.

## 2. Supplementary Tables

**Table S1. Morphometric analysis of liver and kidneys in *Nu/Nu* mice treated with RHTR.**

| Treatments  | Liver                      | Kidneys                    |
|-------------|----------------------------|----------------------------|
| AE          | 1.48 ± 0.22 / 29.41 ± 4.06 | 0.38 ± 0.048 / 9.63 ± 0.69 |
| AF02        | 1.61 ± 0.15 / 30.34 ± 3.33 | 0.40 ± 0.06 / 9.89 ± 0.58  |
| Carboplatin | 1.80 ± 0.10 * / 30.5 ± 2.2 | 0.40 ± 0.01 / 11.5 ± 0.7 * |
| 1X PBS      | 1.53 ± 0.14 / 29.65 ± 2.22 | 0.38 ± 0.042 / 9.34 ± 0.67 |

Results show the mean ± S.D. of two biological replicates ( $n = 5$ ).

Measurement of weight (g) and larger diameter (mm) for liver and kidney

\*,  $p \leq 0.05$  vs. control values treated with 1X PBS vehicle (ANOVA).

The positive control was carboplatin (50 mg/kg/i.p./3 alternating days per week in mice).

RHTR, *Rhus trilobata*; AE, aqueous extract; AF02, aqueous fraction-02 (active fraction).
